# Supplementary material
Source: Springer Nature journal article supplement (https://www.springermedizin.de/resource/supplementary/10194_2013_580_MOESM1_ESM.pdf/9422720)
Supplement: MOESM1 [file 9422720]

Enrollment

1988 sleep studies (PSG with and without assessment of sleep apnea) performed during data collection period 2003 -2009

1017 not invited to participate

971 invited

93 refrained from participating

878 participated

94 did not fill in the headache questionnaire

784 responded to headache questionnaire

Allocation

477 performed sleep apnea sleep study

307 referred to sleep study due to other sleep disorder

Analysis

225 normal  
AHI <5

124 mild  
OSA  
AHI ≥5-14

67 moderate  
OSA  
AHI 15 -29

61 severe  
OSA  
AHI ≥30

307 sleep study  
without assessment  
of AHI
